# Supplementary material for: Undemanding synthesis of N,P co-doped carbon nanosheets for the hydrogen evolution reaction: combining experimental quantitative analysis and DFT calculation corroboration
Source: Royal Society of Chemistry journal article supplement (doi:10.1039/d4ta06226d), 2025-01-01
Supplement: d4ta06226d1.pdf [file d4ta06226d1.pdf]

## Supporting Information

### Electrochemical active surface area (ECSA)

The electrochemically active surface area (ECSA) of each catalyst was inferred from their electrochemical capacitances, determinable through the cyclic voltammetry technique. The potential was varied from 0.15 to 0.25 V versus RHE at five distinct scan rates, which are 10, 20, 30, 40, and 50 mV /s<sup>-1</sup>, respectively. By correlating the scan rate with the current density differential ( $\Delta J$ ) at a constant potential from the anodic to cathodic sweeps, a consistent linear correlation emerges. This slope correlates directly with the ECSA. Such capacitance values ( $C_{dl}$ ) facilitate the evaluation of the relative surface activities of diverse electrodes, particularly when utilized within identical electrolyte environments<sup>1</sup>.

### The turnover frequency (TOF)

The per-site TOF was calculate by the following formula:

$$TOF = \frac{0.064 \times 6.02 \times 10^{23}}{64.4\% \times \frac{12g}{mol} + 27.8\% \times \frac{16g}{mol} + 3.2\% \times \frac{14g}{mol} + 1.8\% \times 31g/mol}$$

The hydrogen turnovers was calculate by the this formula:

$$\begin{aligned} \# H_2 &= (j \frac{mA}{cm^2}) (\frac{1Cs^{-1}}{1000mA}) (\frac{1molH_2}{2mole^{-1}}) (\frac{6.022 \times 10^{23} H_2 molecules}{1molH^2}) \\ &= 3.12 \times 10^{15} \frac{H_2 / s}{cm^2} per \frac{mA}{cm^2} \end{aligned}$$

From the results from XPS and DFT calculation, For N and P co-doped catalyst, we suppose that graphitic nitrogen and C<sub>3</sub>PO have co-catalytic activity, and the neighboring and interstitial carbons of them (12 carbon atoms) are catalytically active. For N doped catalyst, we identified that graphitic nitrogen have catalytic activity, and the neighboring and interstitial carbons of them (6 carbon atoms) are catalytically active. For P doped catalyst, we suppose that C<sub>3</sub>PO have co-catalytic activity, and the neighboring and interstitial carbons of them (6 carbon atoms) are catalytically active. The number of electrochemically operative surface sites on the catalyst was calculated as:

Mass of an electrode:

**(1) Total number of atoms of an electrode for N, P-G:**

$$Mass = \frac{2mg \times 8 \mu L}{250 \mu L} = 0.064mg$$

$$\frac{Mass \text{ of electrode} * N_A}{\sum(atomic\% * M_{atom})}$$

$$= 2.92 \times 10^{18}$$

Active sites of N, P-G:

the total number of atoms of an electrode  $\times$  (*atomic* graphitic N  $\times$  6 + *atomic*

$$= 3.5 \times 10^{17}$$

$C_3PO \times 6$ )

$$= 2.92 \times 10^{18} \times (3.2\% \times 43.5\% \times 6 + 1.8\% \times 34\% \times 6)$$

$$= \frac{0.064 \times 6.02 \times 10^{23}}{65.4\% \times \frac{12g}{mol} + 27.5\% \times \frac{16g}{mol} + 7.1\% \times \frac{14g}{mol}}$$

$$= 2.9 \times 10^{18}$$

**(2) Total number of atoms of an electrode for N-G:**

Active sites of P-G:

the total number of atoms of an electrode  $\times$  *atomic* GN  $\times 6$ )

$$= 2.9 \times 10^{18} \times (7.1\% \times 53.4\% \times 6)$$

**(3) Total number of atoms of an electrode for P-G:**

$$= \frac{0.064 \times 6.02 \times 10^{23}}{69.3\% \times \frac{12g}{mol} + 24.9\% \times \frac{16g}{mol} + 5.8\% \times \frac{31g}{mol}}$$

Active sites of P-G:

$$= 2.7 \times 10^{18}$$

$$= 2.7 \times 10^{18} \times (5.8\% \times 61.4\% \times 6)$$

$$= 5.77 \times 10^{17}$$

the total number of atoms of an electrode  $\times$  *atomic*  $C_3PO \times 6$ )

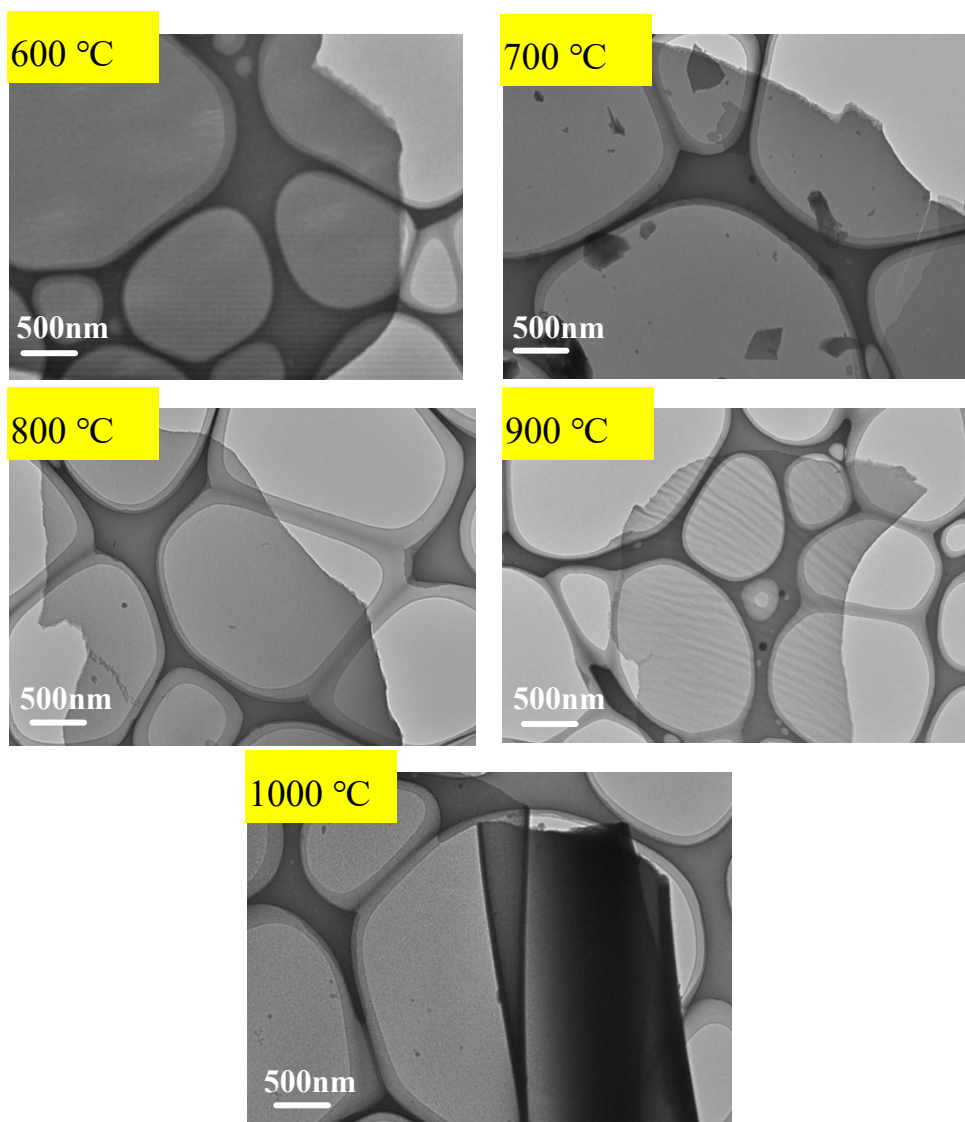

Fig. S1 TEM images of various samples.

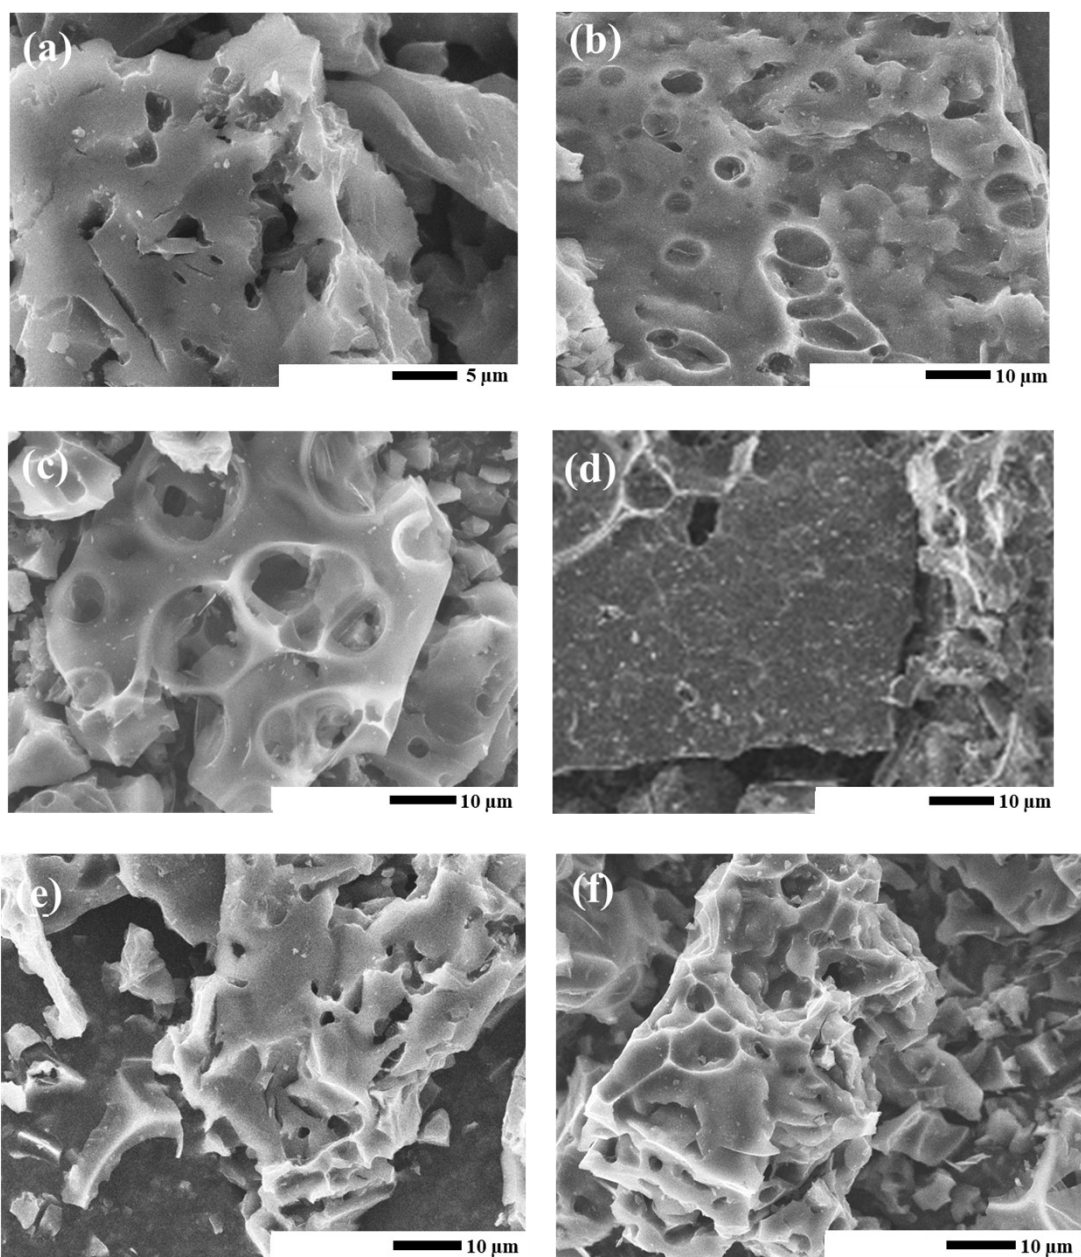

Fig. S2 SEM images of (a) CNP0.2, (b) CNP0.6 (c) CNP0.8, (d) T=700 °C, (e) T=800 °C and (f) T=1000 °C.

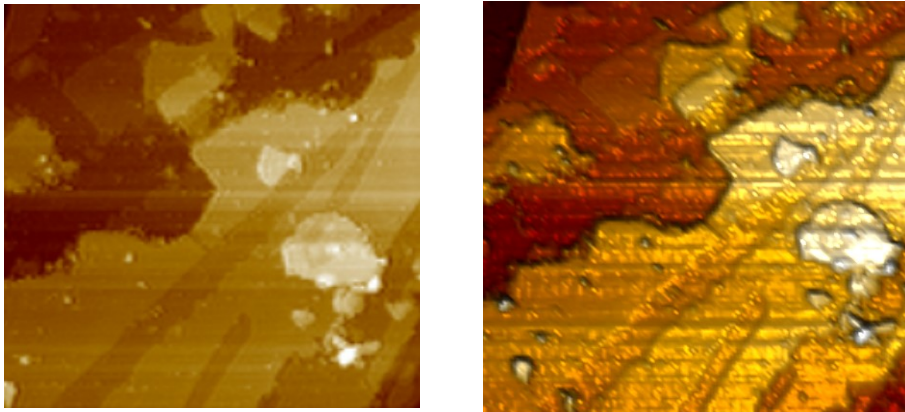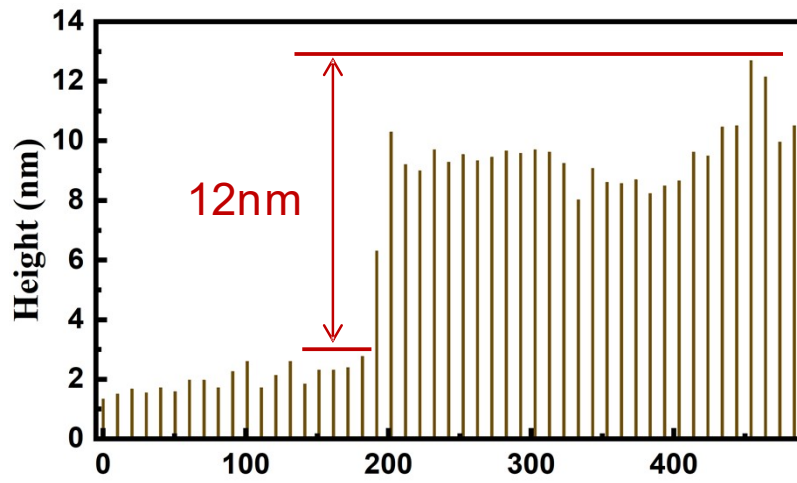

Fig. S3 AFM images and height distributions of CNP0.4 at the scale of micron meter.

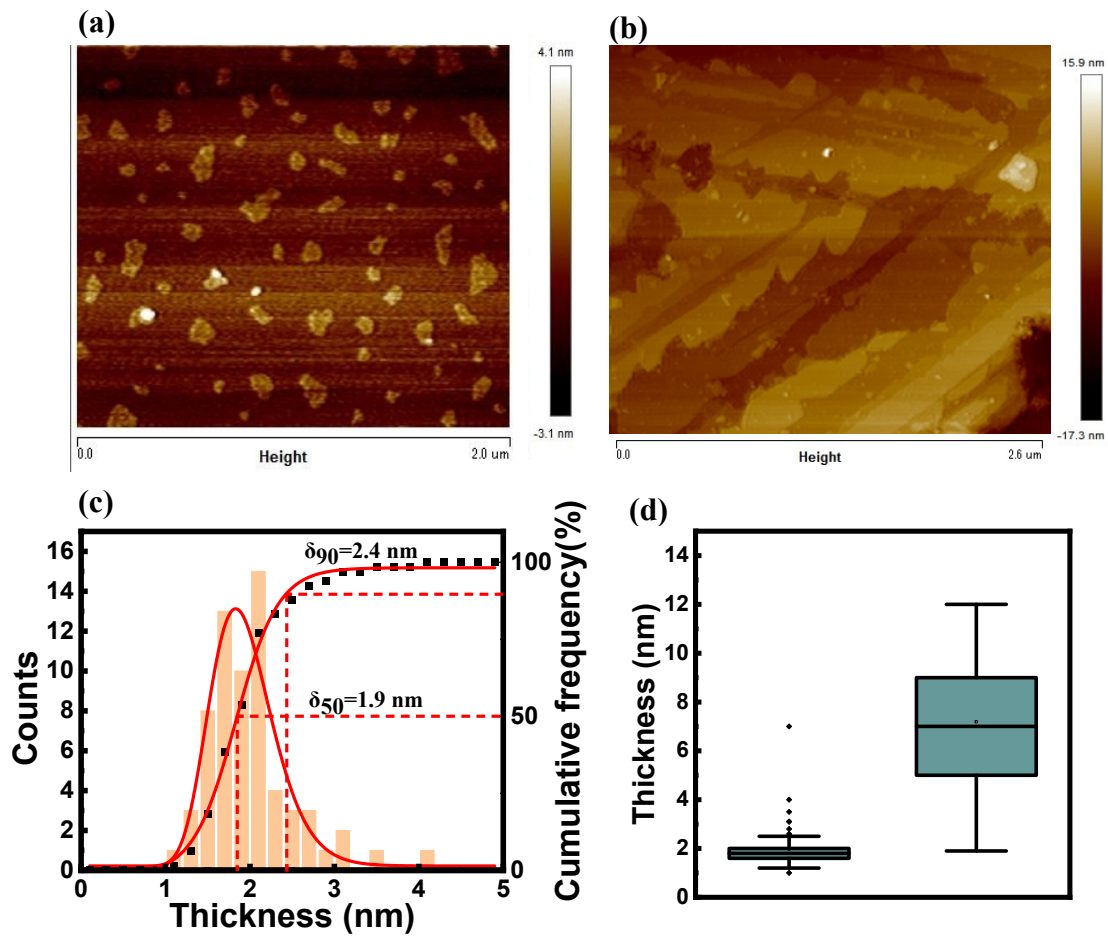

Fig. S4 (a) AFM images of CNP0.4 at the scale less than 800nm. (b) AFM images of CNP0.4 at the scale of 0.8-2 micro meter. (c) Cumulative frequency of thickness for the samples in CNP0.4 at the scale less than 800nm. (d) Thickness distribution box diagram or the samples in CNP0.4 at the scale less than 800nm (left) and the scale of 0.8-2 micro meter (right).

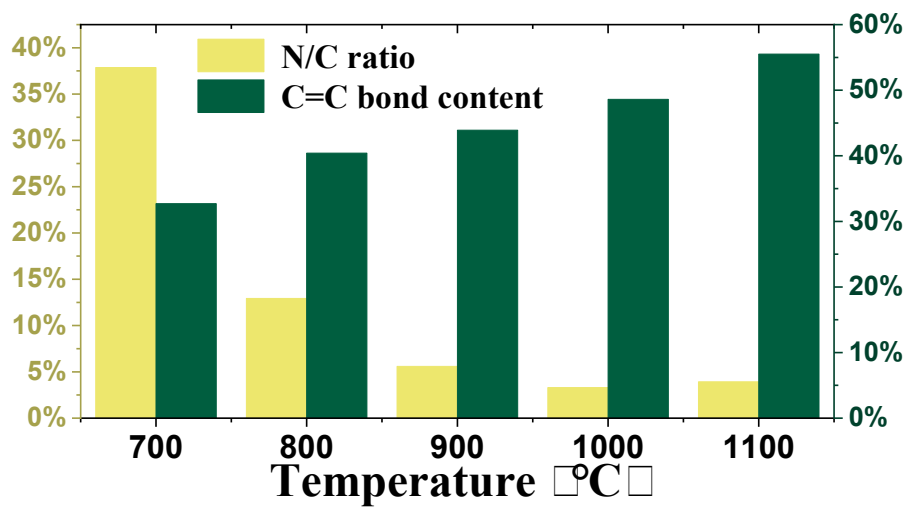

Fig. S5 The changing trend of C=C bonds and N/C ratio of the sample under different heating temperatures.



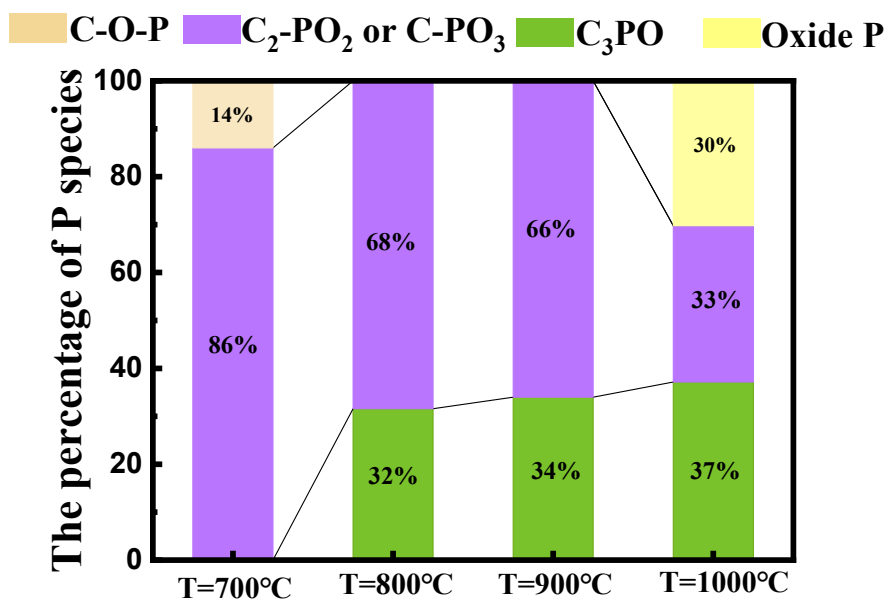

Fig. S6 The P species percentage of T=700 °C, T=800°C, T=900 °C and T=1000 °C.

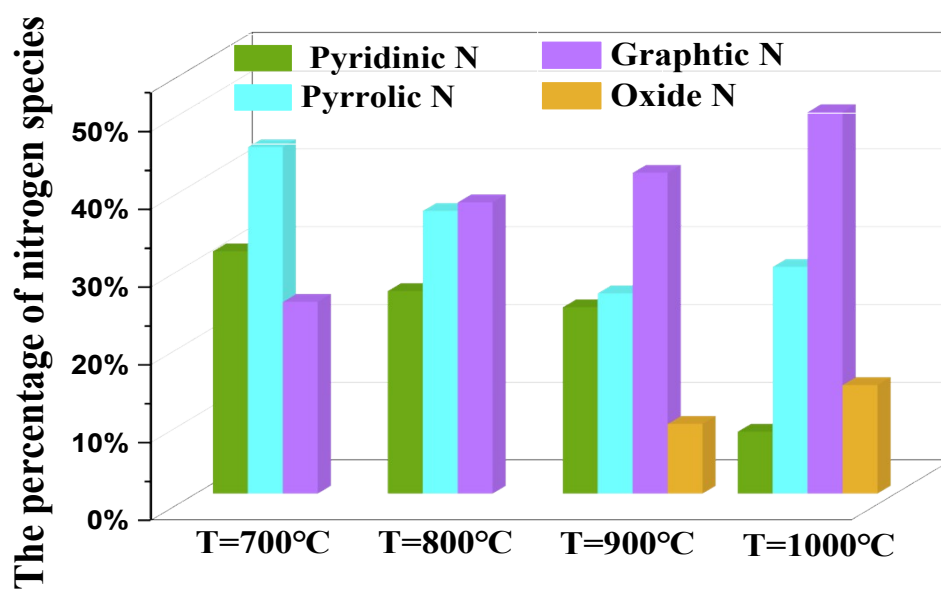

Fig. S7 The N species percentage of T=700 °C, T=800°C, T=900 °C and T=1000 °C.

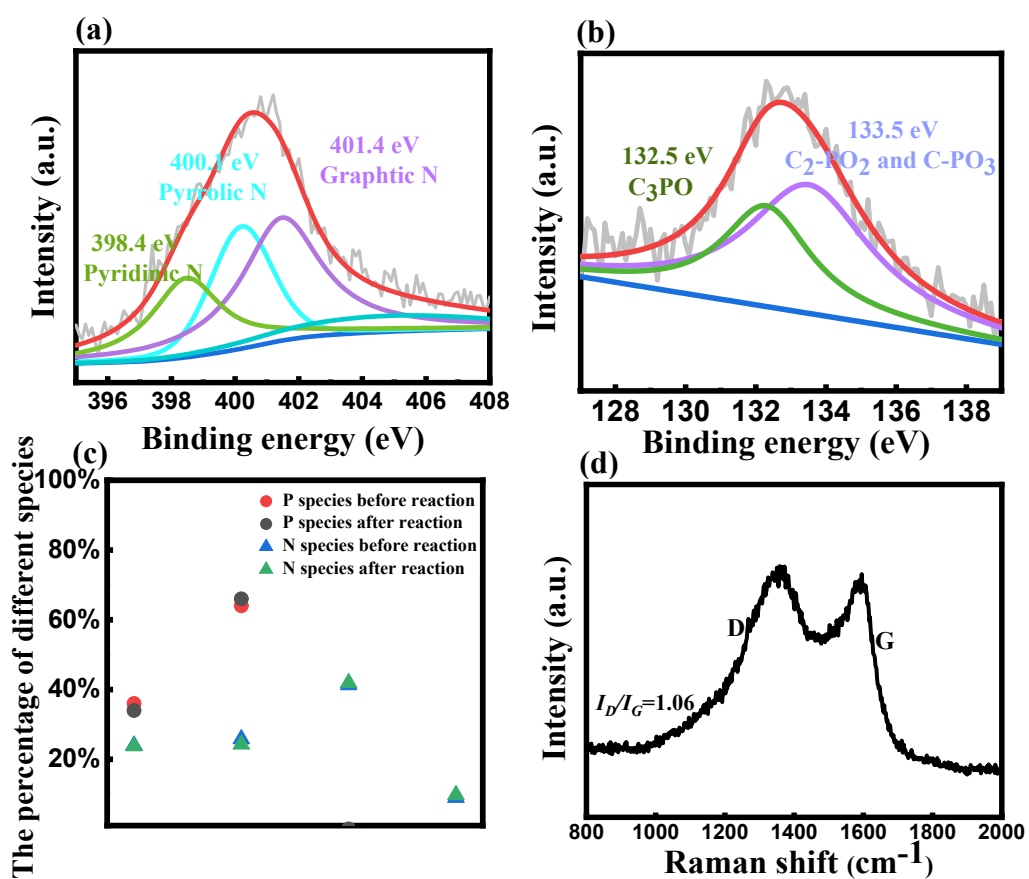

Fig. S8 (a) The N 1s spectrum of CNP0.4 after 100 LSV cycles for HER. (b) The P 2p spectrum of CNP0.4 after 100 LSV cycles for HER. (c) The percentage of different N and P species of CNP0.4 before and after 100 LSV cycles for HER. (d) The Raman spectra of CNP0.4 after 100 LSV cycles for HER.

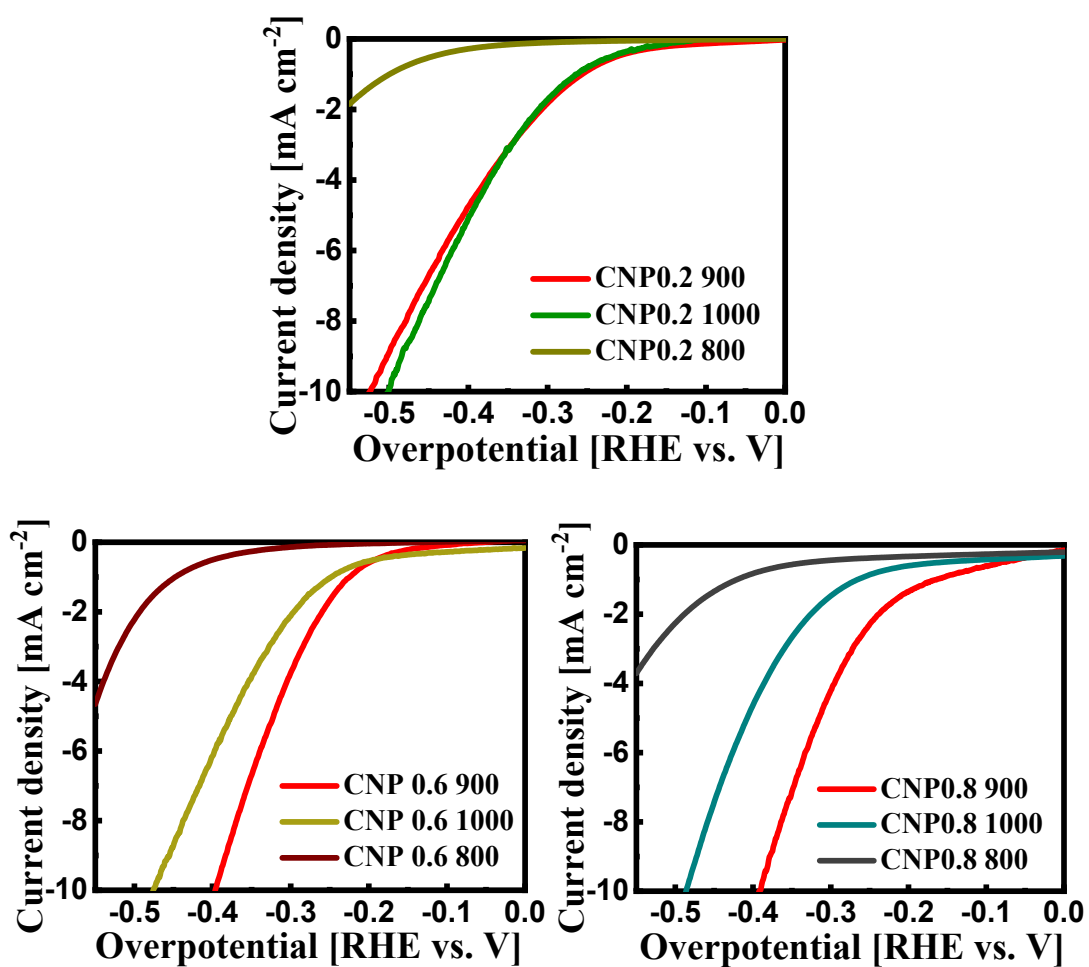

Fig. S9 The as-prepared catalysts using glycine/50% phytic acid =0.2, 0.6 and 0.8 ratio at different carbonization temperatures (800 °C, 900 °C and 1000 °C).

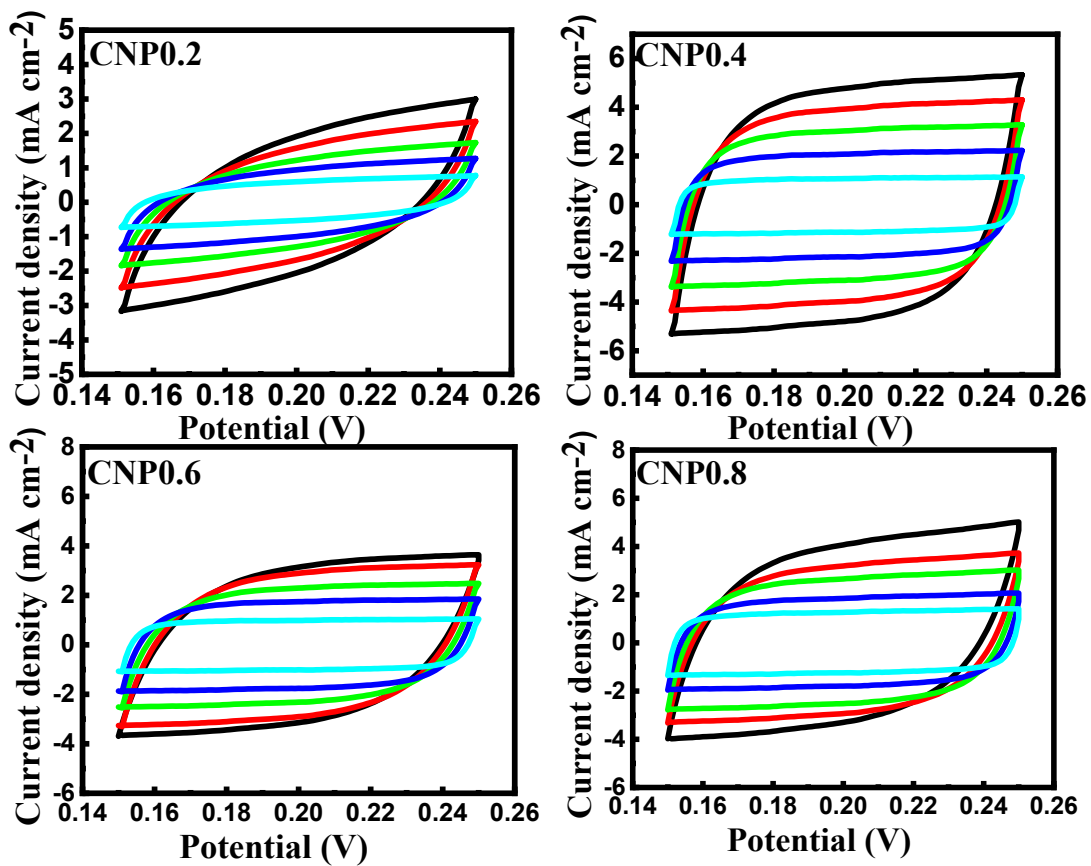

Fig. S10 CV curves of various samples with a sweep speed range from 10 mV s<sup>-1</sup> to 50 mV s<sup>-1</sup>.

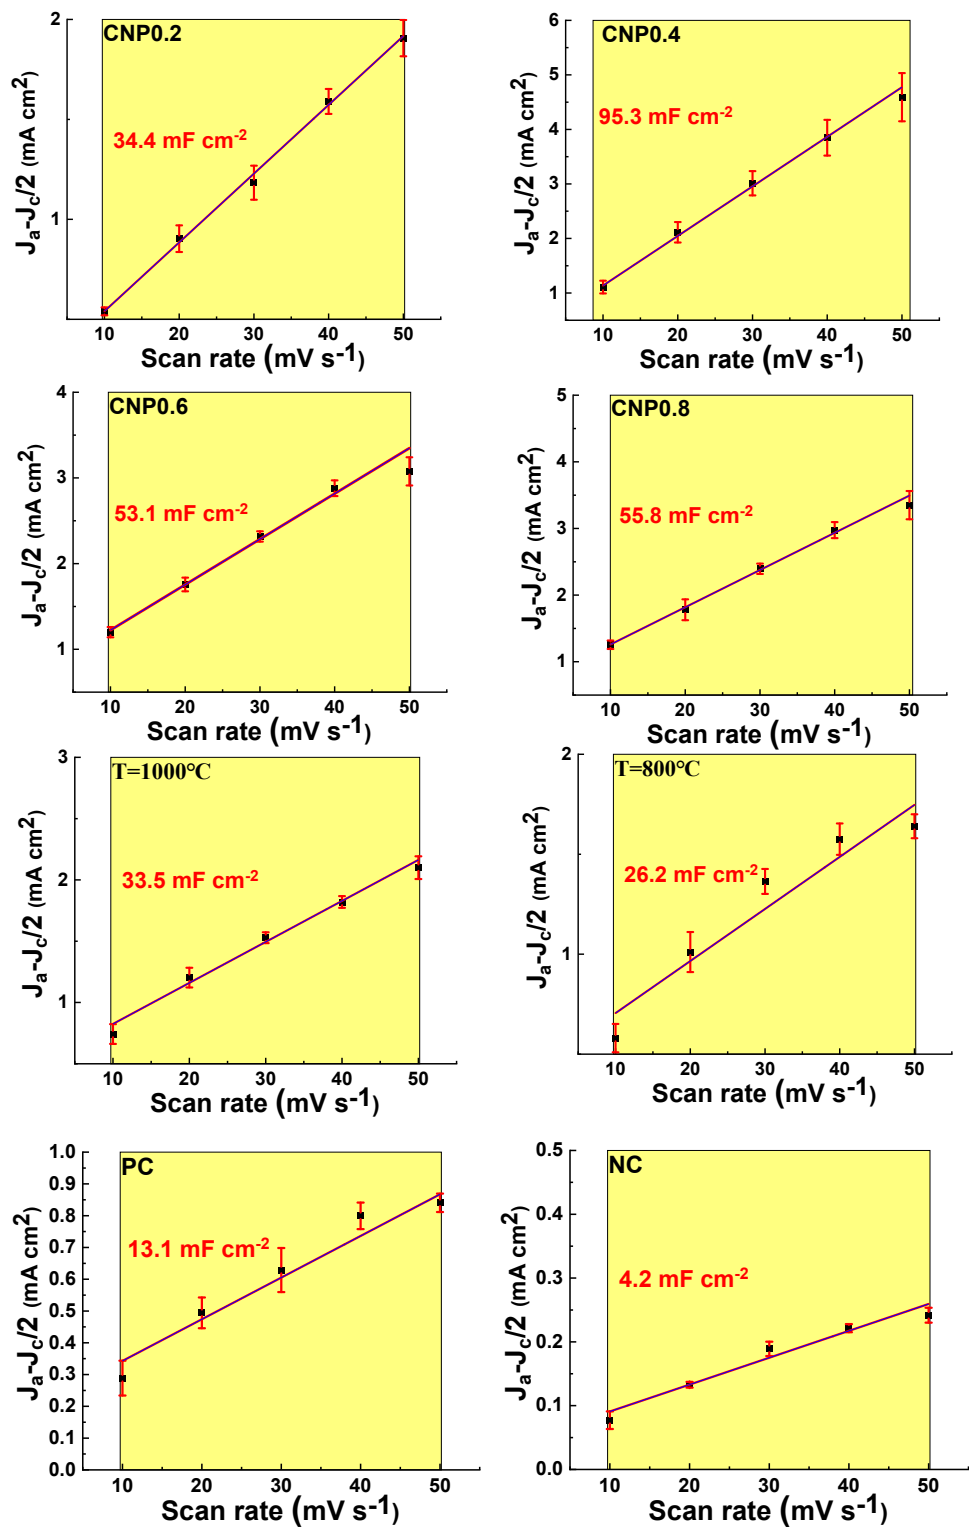

Fig. S11 Error bars of the ESCA of three independent samples.

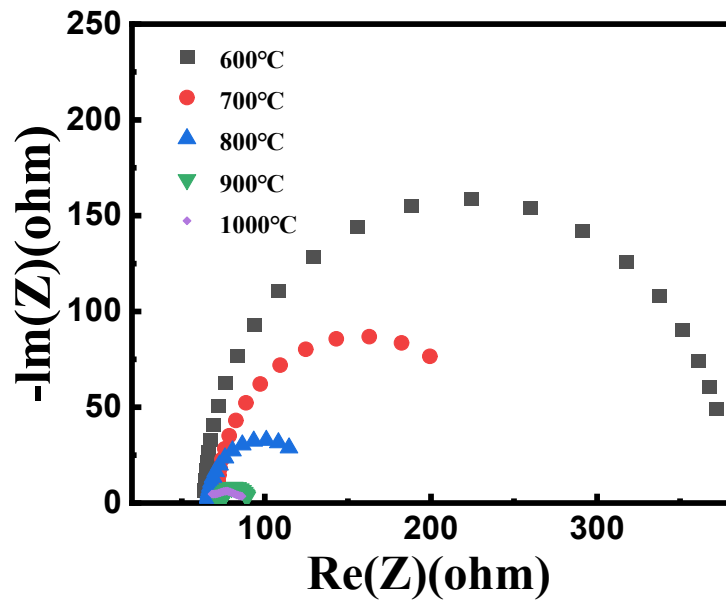

Fig. S12 EIS Nyquist plots for the samples with different heating temperatures.

Fig. S13 TOF per active sites of sample CNP0.4, PC and NC.



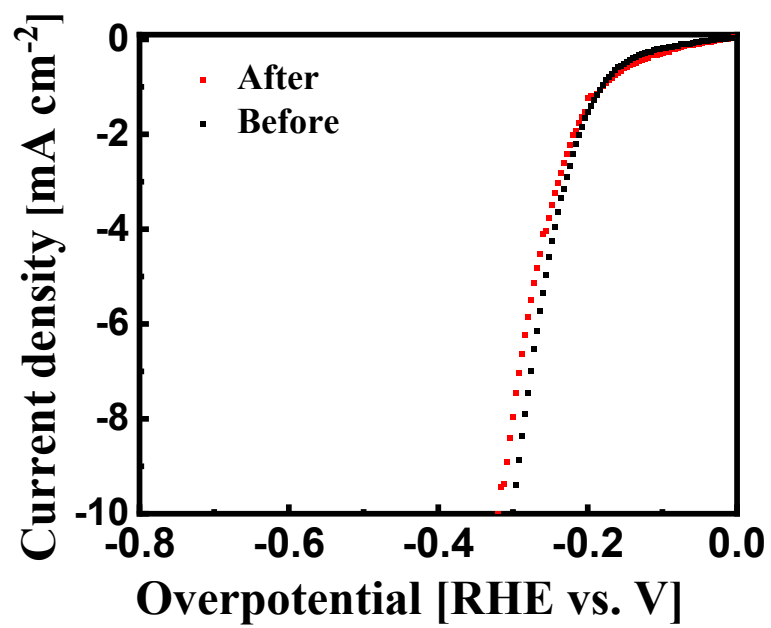

Fig. S14 LSV curves of CNP0.4 before and after 2000 CV cycles.

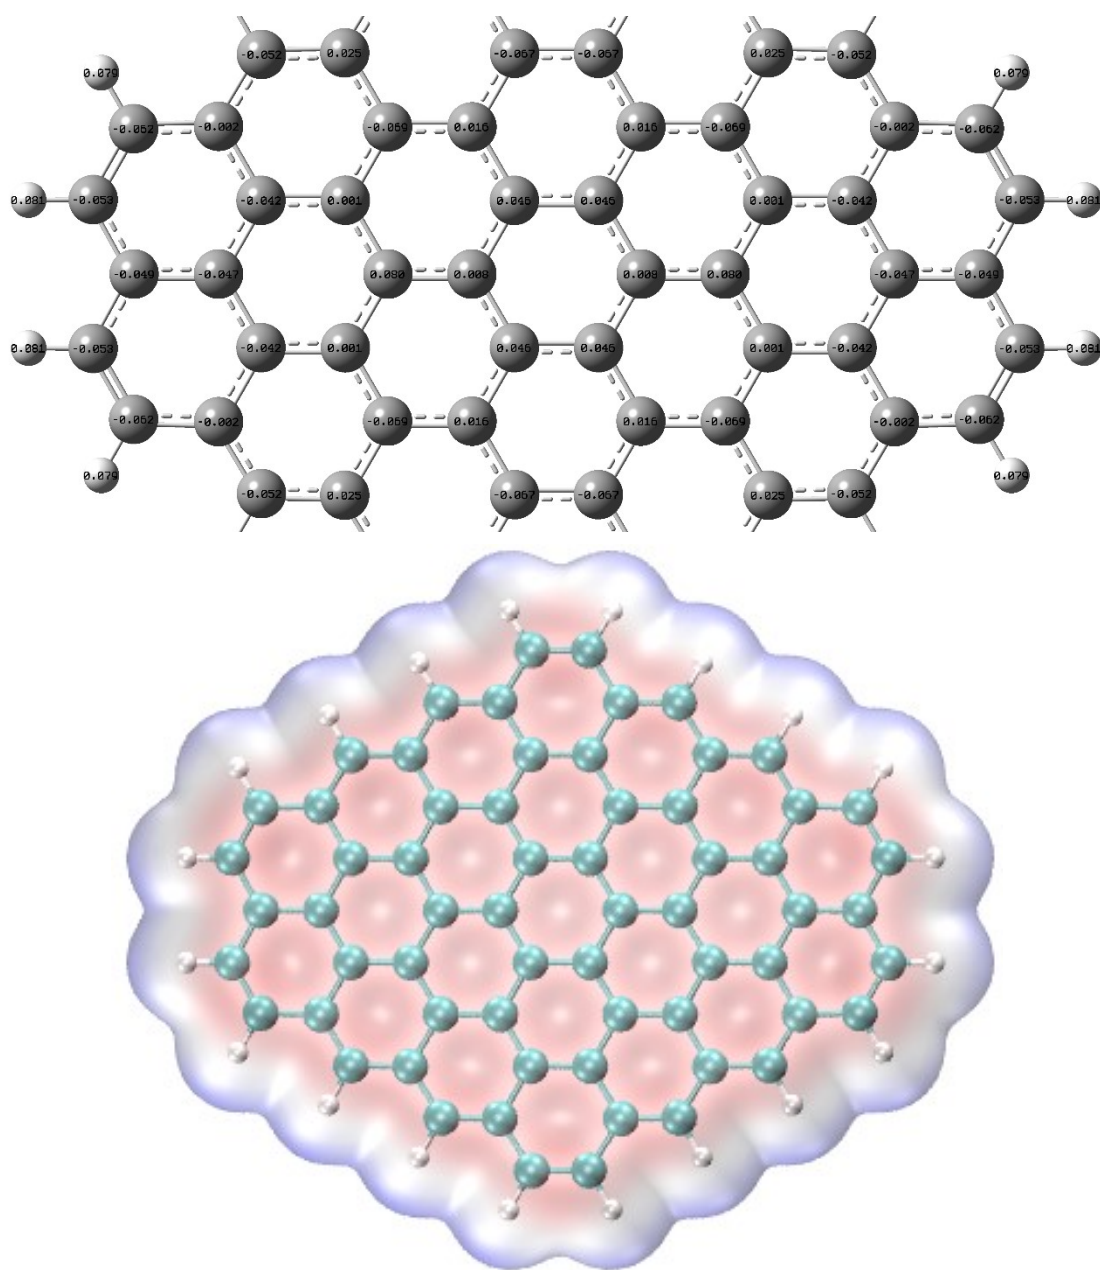

Fig. S15 Mulliken charges and ESP of pure graphene.

|                                   | ESP                                                                                 | r | Cluste | Mulliken charges |
|-----------------------------------|-------------------------------------------------------------------------------------|---|--------|------------------|
| NG                                | 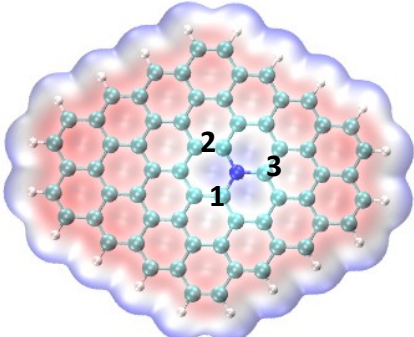   |   | C1     | 0.362            |
|                                   |                                                                                     |   | C2     | 0.367            |
|                                   |                                                                                     |   | C3     | 0.392            |
|                                   |                                                                                     |   | N      | -0.8             |
| PN                                |   |   | C1     | 0.129            |
|                                   |                                                                                     |   | C2     | -0.142           |
|                                   |                                                                                     |   | C3     | 0.109            |
|                                   |                                                                                     |   | N      | -0.382           |
| C <sub>3</sub> PO-G               |  |   | C1     | -0.45            |
|                                   |                                                                                     |   | C2     | -0.391           |
|                                   |                                                                                     |   | C3     | -0.45            |
|                                   |                                                                                     |   | P      | 1.183            |
|                                   |                                                                                     |   | O      | -0.535           |
| C <sub>2</sub> PO <sub>2</sub> -G |  |   | C1     | -0.485           |
|                                   |                                                                                     |   | C2     | -0.494           |
|                                   |                                                                                     |   | P      | 1.262            |
|                                   |                                                                                     |   | O(H)   | -0.528           |
|                                   |                                                                                     |   | O(P)   | -0.55            |

Fig. S16 Mulliken charges and ESP of pure graphene.

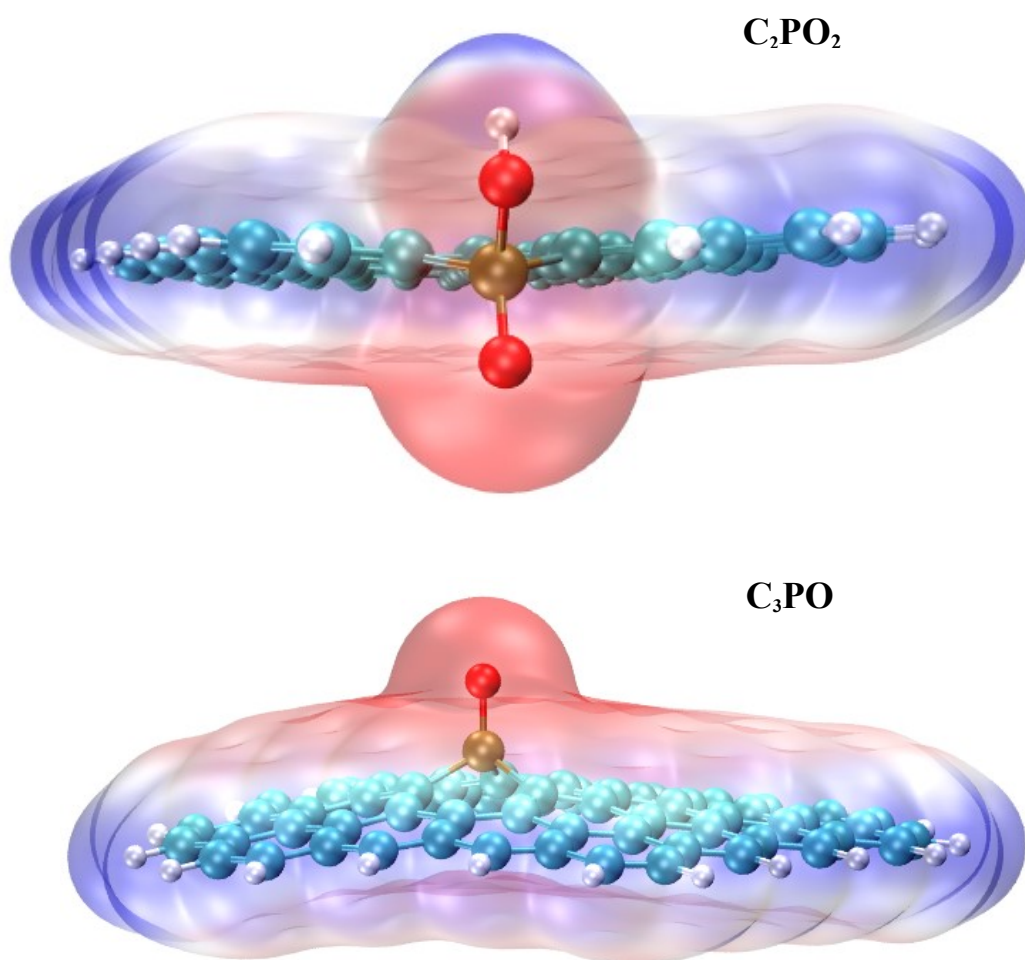

Fig. S17 Side ESP of C<sub>2</sub>PO<sub>2</sub> and C<sub>3</sub>PO Mulliken charges and ESP of pure graphene.

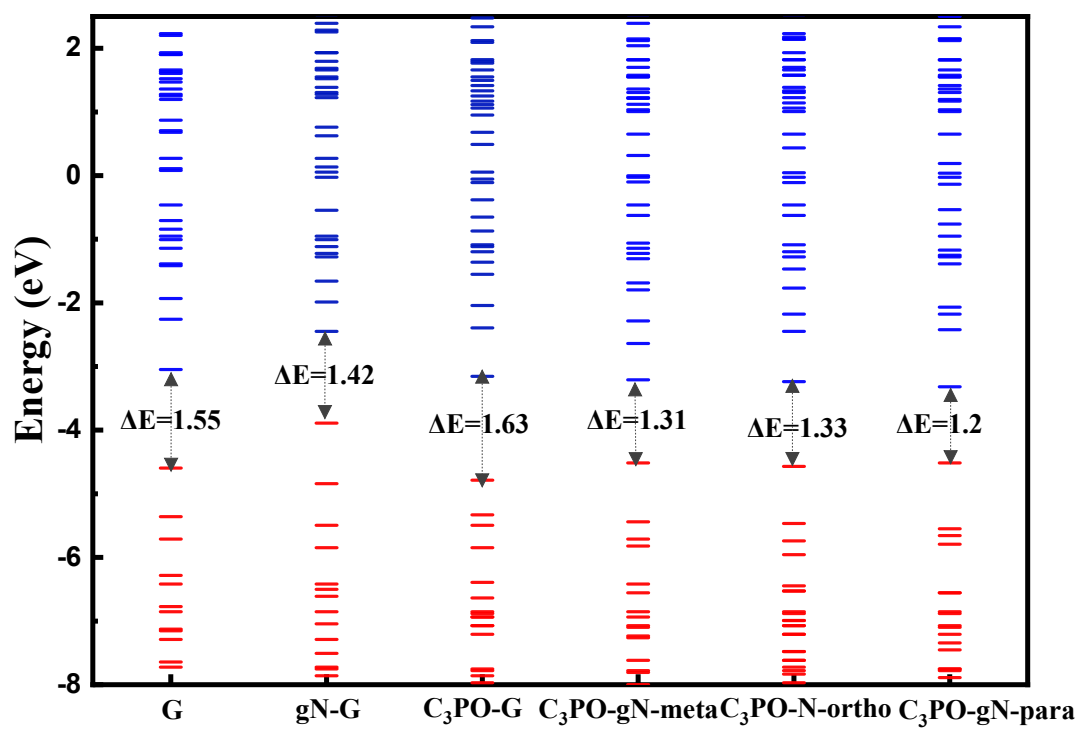

Fig. S18 E(HOMO)-E(LUMO) of the various samples.

Table S1 Mass ratio of starting materials and carbonized temperature.

| Sample name | Mass ratio [-] |                 | Carbonized temperature [°C] |
|-------------|----------------|-----------------|-----------------------------|
|             | Glycine        | 50% Phytic acid |                             |
| CNP0.2      | 0.2            | 0.12            | 900                         |
| CNP0.4      | 0.2            | 0.16            | 900                         |
| CNP0.6      | 0.2            | 0.24            | 900                         |
| CNP0.8      | 0.2            | 0.32            | 900                         |
| NC          | 0.2            | /               | 900                         |
| PC          | /              | 0.16            | 900                         |
| T=600°C     | 0.2            | 0.16            | 600                         |
| T=700°C     | 0.2            | 0.16            | 700                         |
| T=800°C     | 0.2            | 0.16            | 800                         |
| T=900°C     | 0.2            | 0.16            | 900                         |
| T=1000°C    | 0.2            | 0.16            | 1000                        |

Table S2 The lattice constant (physics) of various samples.

| Catalyst | FWHM  | 2 $\theta$ | $d_{002}$<br>[nm] | R <sup>2</sup> |
|----------|-------|------------|-------------------|----------------|
| T=600°C  | 10.89 | 22.63      | 0.4               | 0.975          |
| T=700°C  | 10.72 | 22.7       | 0.399             | 0.983          |
| T=800°C  | 10.5  | 23.9       | 0.380             | 0.973          |
| T=900°C  | 9.7   | 24.34      | 0.373             | 0.966          |
| T=1000°C | 9.7   | 24.2       | 0.376             | 0.967          |

The half-peak widths (FWHM) and 2 $\theta$  were obtained by fitting the characteristic peaks of (002) crystal plane. The d spacing of (002) was calculate by Bragg equation.

The R<sup>2</sup> denotes the coefficient of determination.

Table S3 The atomic content of C and P in samples.

| Ratio  | C [%] | P[%] | P/C[%] |
|--------|-------|------|--------|
| CNP0.2 | 88.78 | 2.37 | 2.7    |
| CNP0.4 | 86.17 | 2.57 | 2.98   |
| CNP0.6 | 92.03 | 2.43 | 2.6    |
| CNP0.8 | 86.07 | 2.61 | 3      |



Table S4 Height distributions of CNP0.4 at the scale of micron meter.

| Area      | Average height (nm) | Maximum height (nm) | Surface area (nm <sup>2</sup> ) |
|-----------|---------------------|---------------------|---------------------------------|
| Polygon 1 | 8.7                 | 12                  | 693000                          |
| Polygon 2 | 5.3                 | 6.7                 | 127500                          |

Table S5 The Overpotentials and Tafel slopes of the samples.

| Sample   | Overpotential (mV vs. RHE) | Tafel slop (mV dec) |
|----------|----------------------------|---------------------|
| Pt       | 67                         | 43                  |
| CNP0.2   | 524                        | 193                 |
| CNP0.4   | 306                        | 104                 |
| CNP0.6   | 396                        | 152                 |
| CNP0.8   | 401                        | 186                 |
| NC       | >600                       | /                   |
| PC       | >600                       | /                   |
| T=600°C  | >600                       | /                   |
| T=700°C  | >600                       | /                   |
| T=800°C  | >600                       | 228                 |
| T=900°C  | 306                        | 104                 |
| T=1000°C | 361                        | 131                 |

Table S6 Comparisons of HER activity with CNP samples in the literature.

| Sample                                    | Overpotential<br>(mV vs. RHE) | Tafel slop<br>(mV dec) | Reference                                                     |
|-------------------------------------------|-------------------------------|------------------------|---------------------------------------------------------------|
| <b>CNP0.4</b>                             | <b>306</b>                    | <b>121</b>             | <b>This work.</b>                                             |
| N,P-CN <sup>2</sup>                       | 550                           | 118                    | ACS Nano 2017, 11, 7293–7300                                  |
| N, P-codoped carbon nanotube <sup>2</sup> | 550                           | 139                    | ACS Nano 2017,11(7), 7293-7300                                |
| N,P-graphene <sup>3</sup>                 | 420                           | 145                    | ACS Nano 2014, 8, 5, 5290–5296                                |
| N,P-C <sup>4</sup>                        | 293                           | 130.89                 | Journal of Solid State Chemistry 284 (2020) 121182            |
| PNG-4-1000 <sup>5</sup>                   | 338                           | 88                     | International journal of hydrogen energy 46 (2021) 2192–21938 |
| N, P, F-tri-doped graphene                | 520                           | /                      | Chem. Int.Ed. 2016,55(42), 13296-13300                        |

Table S7 Comparisons of Cdl with other carbon material with special morphology in the literature.

| Catalyst   | ESCA( mF cm <sup>-2</sup> ) | Morphology             | Reference                                                                                 |
|------------|-----------------------------|------------------------|-------------------------------------------------------------------------------------------|
| This work. | 93.5                        | Nanosheet              | /                                                                                         |
| N,P-CN     | 4.5                         | Nanosheet              | ACS Nano 2017, 11, 7293–7300                                                              |
| 3DNG-P     | 22.3                        | Plasma-etched graphene |                                                                                           |
| N,S-CN     | 11.5                        | Nanosheet              | ACS Nano 2017, 11, 7293–7300                                                              |
| NCNS-900   | 28.8                        | Nanosheet              | Nanoscale, 2017, 9, 16342                                                                 |
| SG-P       | 16.5                        | Plasma-etched graphene | International Journal of Hydrogen Energy, Volume 43, Issue 6, 8 February 2018, Pages 3366 |
| NCNT       | 5.11                        | CNT                    | Nano Lett. 2014, 14, 3, 1228–1233                                                         |

## Reference

- 1 Jieming Huang et al., *Chemical Engineering Journal*, 2023, 469, 143908.
- 2 Konggang Qu et al., *ACS Nano*, 2017, 11, 7293–7300.
- 3 Yao Zheng et al., *ACS Nano*, 2014, 8, 5, 5290–5296.
- 4 Yu Sun et al., *Journal of Solid State Chemistry*, 2020, 284, 121182.
- 5 Balasingh T. J et al., *International journal of hydrogen energy*, 2021, 4, 21924.
